# Supplementary material for: The hydrothermal in situ construction of AgVO3/LaVO4 phase junctions for the efficient visible-light-driven disposal of pollutants and photoelectrocatalytic methanol oxidation
Source: Royal Society of Chemistry journal article supplement (doi:10.1039/c9se01132c), 2020-01-01
Supplement: c9se01132c1.pdf [file c9se01132c1.pdf]

## Electronic supplementary material

# Hydrothermal *in-situ* construction of AgVO<sub>3</sub>/LaVO<sub>4</sub> phase junctions for the efficient visible-light-driven pollutants disposal and photoelectrocatalytic methanol oxidation

Xiaoxiao Li,<sup>a</sup> Kailian Zhang,<sup>a</sup> Man Zhou<sup>c</sup>, Kai Yang,<sup>\*a</sup> Laixi Zou,<sup>\*a</sup> Wenqiang Li,<sup>a</sup> Jian Huang,<sup>a</sup>  
Changlin Yu,<sup>\*b</sup> Weiya Huang,<sup>a</sup> Yu Niu<sup>d</sup>

<sup>a</sup> School of Chemistry and Chemical Engineering, Jiangxi University of Science and Technology,  
Ganzhou 341000, Jiangxi, China

<sup>b</sup> School of Environmental Science and Engineering, Guangdong Province Key Laboratory of  
Petrochemical Pollution Process and Control, Guangdong University of Petrochemical  
Technology, Maoming 525000, Guangdong, China

<sup>c</sup> School of Pharmaceutical Sciences, Gannan Medical University, Ganzhou 341000, Jiangxi, China

<sup>d</sup> Fujian Provincial Collaborative Innovation Center for Clean Coal Gasification, Technology College  
of Resources and Chemical Engineering, Sanming University, Sanming 365004, China

1. \*Corresponding author: Kai Yang, Ph. D. Associate Professor

Tel/Fax: +86-797-8312334

E-mail: 19979706763@126.com

2. \*Corresponding author: Laixi Zou, Ph. D.

Tel/Fax: +86-797-8312334

E-mail: zoulaixi@jxust.edu.cn

3. \*Corresponding author: Changlin Yu, Ph. D. Professor

Tel/Fax: +86-668-2982253

E-mail: yuchanglinjx@163.com

As known,  $\text{LaVO}_4$  crystalline has two polymorphs, that is, tetragonal phase (t) with zircon structure and monoclinic phase (m) with monazite structure.<sup>1</sup> m- $\text{LaVO}_4$  has drawn considerable interest because of its surface catalytic properties, and the absorption of visible light. Herein, m- $\text{LaVO}_4$  was prepared and applied. m- $\text{LaVO}_4$  belongs to the monoclinic structure with group of  $P21/n$ (NO. 14). The lattice parameters of m- $\text{LaVO}_4$  are  $a=7.139$ ,  $b=7.353$ ,  $c=6.804$ ,  $\beta= 105.306^\circ$ . Every V atom lies in the center of tetrahedron composed by 4 O atoms, every La atom connects with O atoms in 9 tetrahedral  $\text{VO}_4$ , as shown as Fig. S1.

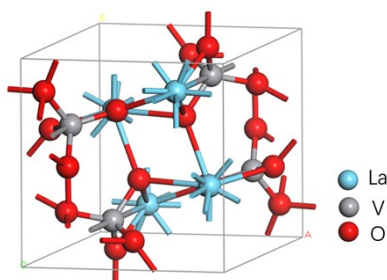

**Fig. S1** The structure of m- $\text{LaVO}_4$

$\text{AgVO}_3$  can be crystallized in four different structures.  $\alpha$ - $\text{AgVO}_3$ ,  $\gamma$ - $\text{AgVO}_3$  and  $\delta$ - $\text{AgVO}_3$  are metastable and  $\beta$ - $\text{AgVO}_3$  is the only one of thermodynamically stable.  $\alpha$ - $\text{AgVO}_3$  and  $\beta$ - $\text{AgVO}_3$  show one-dimensional morphologies, and they can be found in the form of nanowires, nanorods or nanotubes. The  $\alpha$ - $\text{AgVO}_3$  phase can be irreversibly transformed into  $\beta$ - $\text{AgVO}_3$  at temperatures up to  $200^\circ\text{C}$ .<sup>2</sup>  $\beta$ - $\text{AgVO}_3$  was obtained in this work and it had monoclinic crystalline system, space group of  $C_m$ , and crystallographic parameters are  $a = 18.106$ ,  $b = 3.579$ ,  $c = 8.043 \text{ \AA}$  and  $\beta = 104.44^\circ$ ,<sup>3</sup> as shown as Fig. S2.

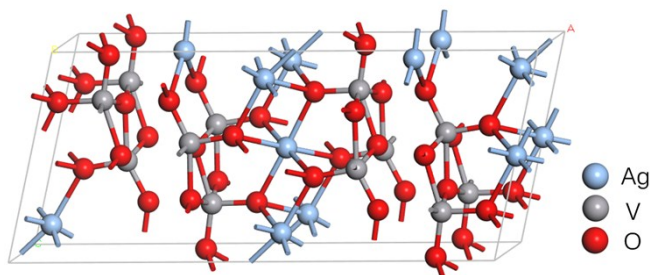

**Fig. S2** The structure of  $\beta$ - $\text{AgVO}_3$ .

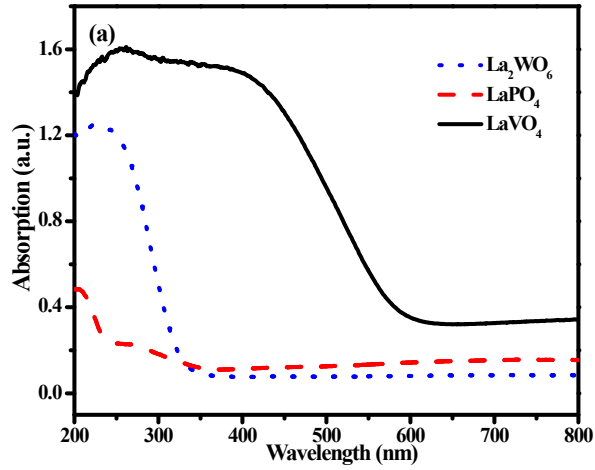

Fig. S3 UV-Vis DRS Spectra of different lanthanum salts.

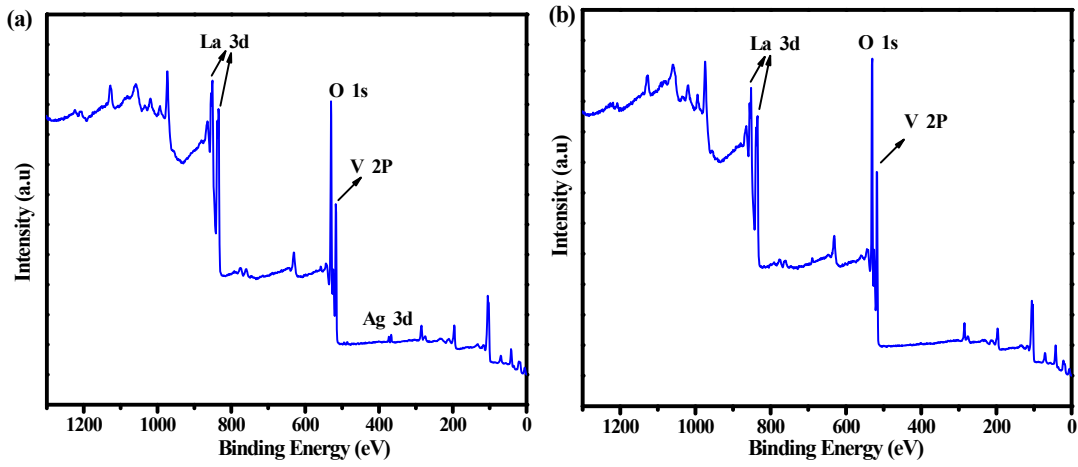

Fig.S4 XPS spectra of LaVO<sub>4</sub> and AgVO<sub>3</sub>/LaVO<sub>4</sub>, (a) survey spectrum of AgVO<sub>3</sub>/LaVO<sub>4</sub>; (b) survey spectrum of pure LaVO<sub>4</sub>.

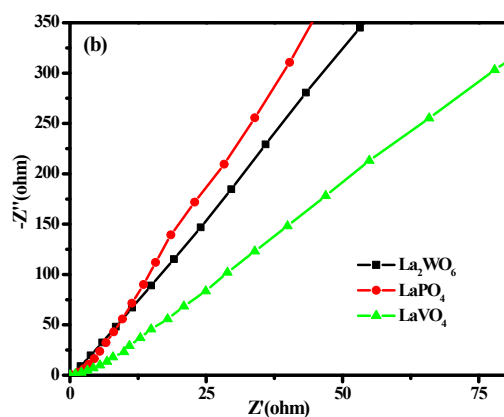

Fig. S5 Electrochemical impedance spectroscopy (EIS) Nyquist plots of different lanthanum salts.

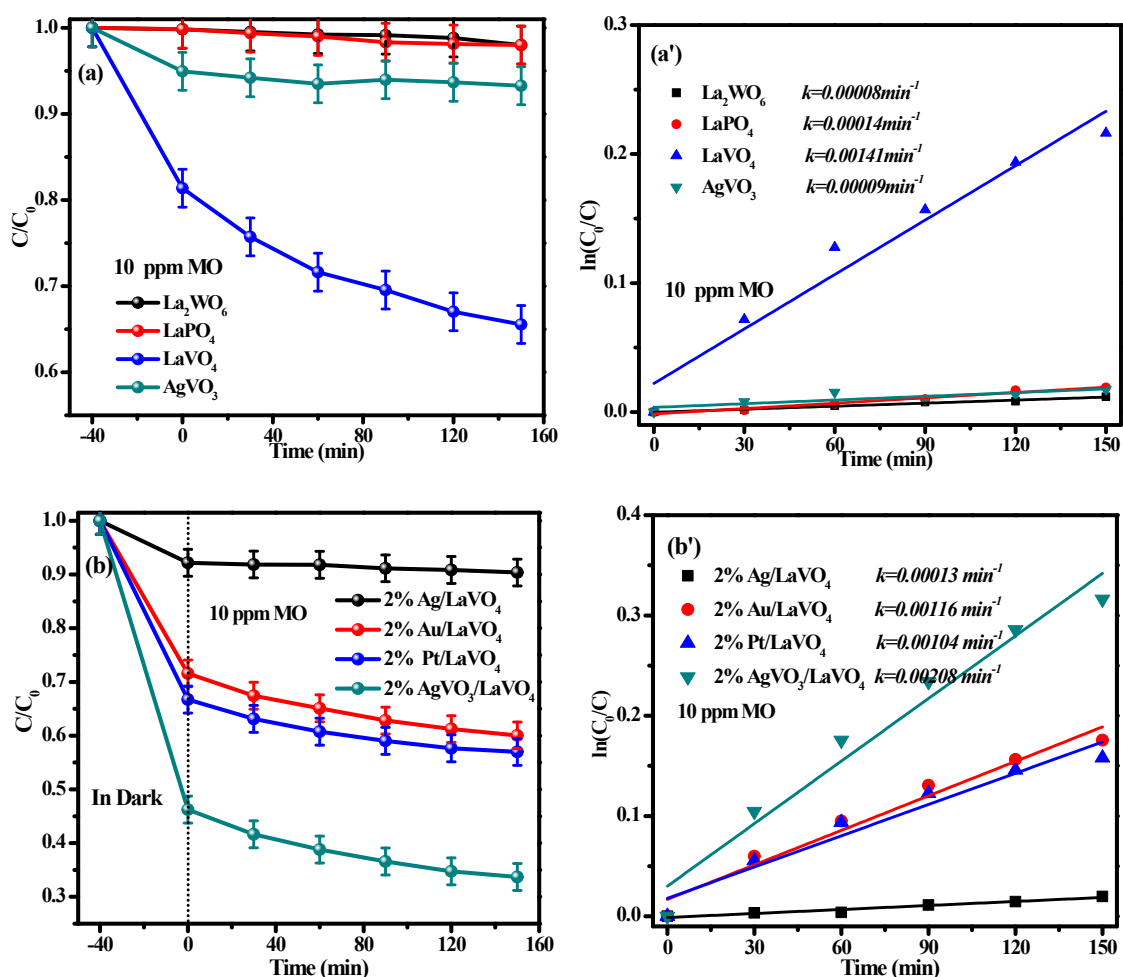

Fig. S6 The degradation and kinetic plots of MO and AO solution with different samples under the visible light irradiation. a and a' correspond to MO degradation of  $\text{La}_2\text{WO}_6$ ,  $\text{LaPO}_4$ ,  $\text{LaVO}_4$  and  $\text{AgVO}_3$ ; b and b' MO degradation of  $\text{Au/LaVO}_4$ ,  $\text{Ag/LaVO}_4$  and  $\text{Pt/LaVO}_4$  catalysts.

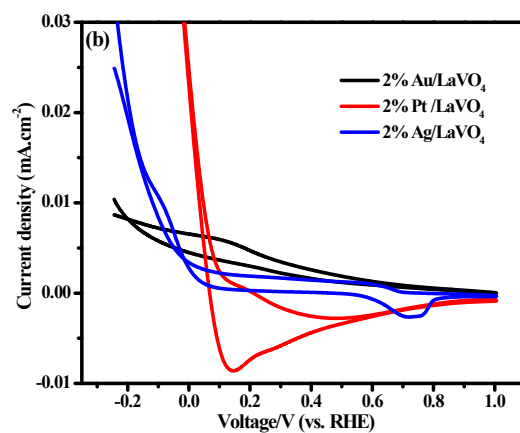

Fig. S7 CV curves over LaVO<sub>4</sub> catalysts supported by Au, Pt And Ag nanoparticles under visible light irradiation.

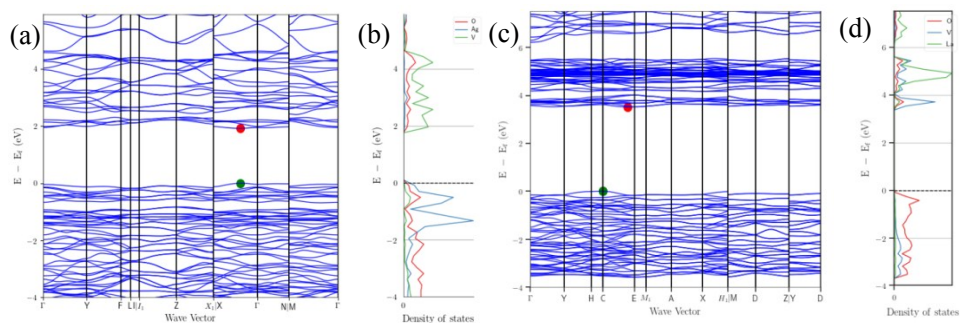

Fig.S8 (a) The projected band structures and (b) PDOS of AgVO<sub>3</sub>, (c) the projected band structures and (d) PDOS of LaVO<sub>4</sub>.

## References

- [1] L. P. Wang, L. M. Chen, *Mater. Charact.*, 2012, 69, 108-114.
- [2] R. C. Oliveira, M. M. Teixeira, J. P. C. Costa, M. Penha, E. M. Francisco, J. S. da Silva, M. S. Li, E. Longo, L. Gracia, J. Andrés, *Ceram. Int.*, 2018, 44, 5939–5944.
- [3] A. P. de Melo Monteiro, R. Dias Holtz, L. Carneiro Fonseca, C. H. Zanini Martins, M. de Sousa, L. A. V. de Luna, D. L. de Sousa Maia, O. L. Alves, *Chem. Rev.*, 2018, 18, 973–985.
